# Supplementary material
Source: PubMed Central journal article supplement (PMC3351318)
Supplement: supp_M112.358705_jbc.M112.358705-1.pdf [file supp_M112.358705_jbc.M112.358705-1.pdf]

**Supplemental Figure 1. Colony-forming units (CFU) analysis of WT and *Nlrc4*<sup>-/-</sup> mice after *C. rodentium* infection.** WT and *Nlrc4*<sup>-/-</sup> mice were infected with *C. rodentium* at a dose of 4x10<sup>9</sup> cfu/mouse. *Citrobacter* load in feces was measured by colony assay at day 10, 17 and 21. \*\* *p*<0.01 versus WT. Data represent means ± SEM (n=8/group) and are representative of two independent experiments.

**Supplemental Figure 2. Splenomegaly development of inflammasome-deficient mice after *C. rodentium* infection.** WT and *Casp1*<sup>-/-</sup> mice were orally infected with *C. rodentium* at a dose of 4x10<sup>9</sup> cfu/mouse. At day 14 and 21, mice were sacrificed and spleens were weighted. (A) Representative photograph of WT and *Casp1*<sup>-/-</sup> mice spleen at 14 days after *C. rodentium* infection. (B) Spleen weight. \**p*<0.05, \*\* *p*<0.01 versus WT. Data represent means ± SEM (n=8 mice/group) and are representative of three independent experiments.

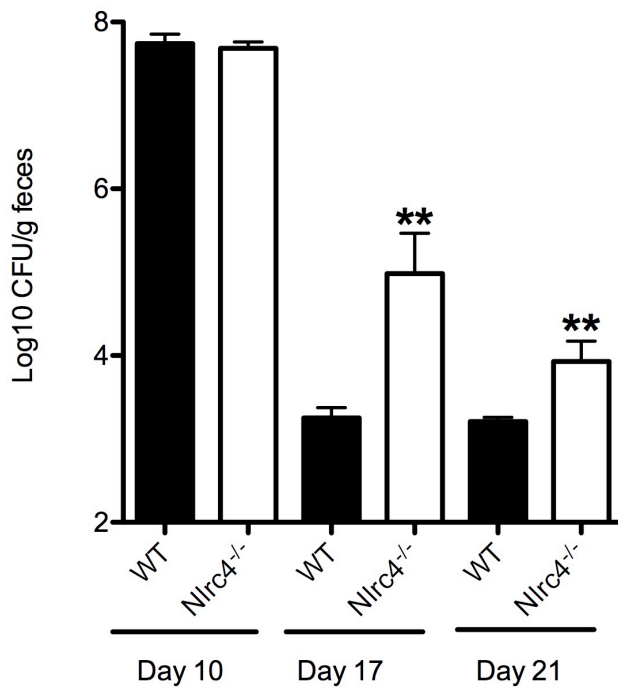

**Figure S1**

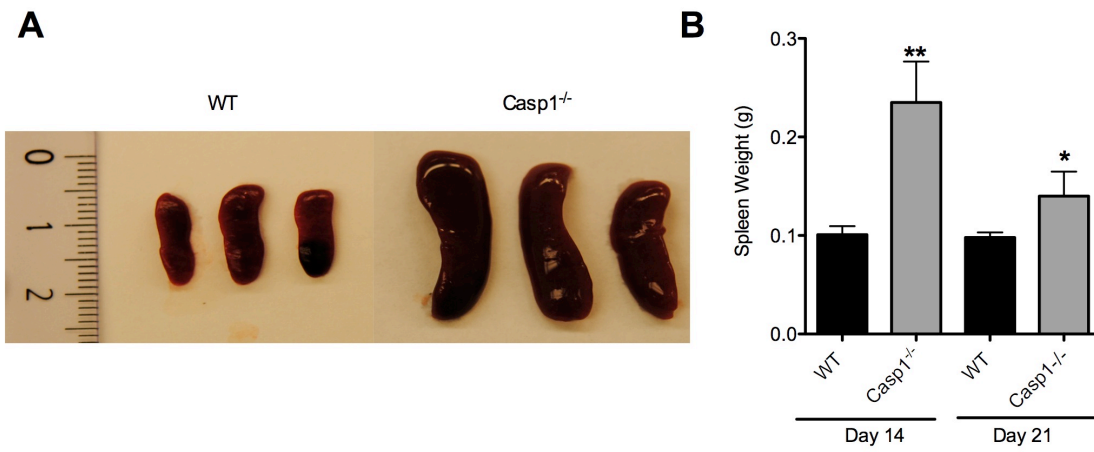

**Figure S2**
